# Supplementary material for: Synthesis, structural characteristics, and adsorption properties of benzimidazole-functionalized hyper-cross-linked resin
Source: Royal Society of Chemistry journal article supplement (doi:10.1039/d5nj02134k), 2025-01-01
Supplement: d5nj02134k1.pdf [file d5nj02134k1.pdf]

## Supplementary Material

### Synthesis, structural characteristics, and adsorption properties of benzimidazole-functionalized hyper-cross-linked resin

Jixia Li<sup>a,‡</sup>, Yang Tan<sup>a,‡</sup>, Wenkai Chen<sup>b</sup>, Gui Chen<sup>a,c\*</sup>, Lizhi Chen<sup>a</sup>, Jiahui  
He<sup>a</sup>, Sitong Wang<sup>a</sup>, Haizhou Zhang<sup>a,c</sup> and Ye Yuan<sup>a,c\*</sup>

<sup>a</sup> *College of Chemistry and Materials, Huaihua University, Huaihua  
418000, P. R. China*

<sup>b</sup> *China Coal Research Institute Corporation Ltd., Beijing 100013, P. R.  
China*

<sup>c</sup> *Hunan Engineering Laboratory for Preparation Technology of  
Polyvinyl Alcohol (PVA) Fiber Material, Huaihua University, Huaihua  
418000, P. R. China*

#### \* Corresponding author

Tel.: +86-745-2851014.

*E-mail address:* cg@hhtc.edu.cn (G. Chen); yuanye@hhtc.edu.cn (Y.  
Yuan)

<sup>‡</sup> Jixia Li and Yang Tan contributed equally to this work.

## **1. Experimental section**

### **1.1. Reagents and instrument**

Macroporous chloromethylated polystyrene (CMPs, with a cross-linking degree of 6.0% and a chlorine content of 17.3% w/w) was purchased from Tianjin Nankai Hecheng Co., Ltd, China. Benzimidazole (BZI, AR, 99.5%), Anhydrous ferric chloride (AR, 99.5%), 1,2-dichloroethane (DCE, AR, 99.5%), anhydrous ethanol (AR, 99.5%) were obtained from Aladdin Reagent Co. Ltd. China. Salicylic acid (SA, AR, 99.5%) was acquired from Tianjin Photovoltaic Surprise Chemical Research Institute, China. All other reagents were of commercial grade and used without further treatment.

### **1.2. Adsorbent characterizations**

FT-IR spectra of the resin were recorded using a Nicolet 6700 Fourier Transform Infrared Spectrophotometer (Thermo Scientific Co., USA) via the potassium bromide (KBr) disk method in the wavenumber range of 400-4000  $\text{cm}^{-1}$ . The textural properties of the samples were analyzed by  $\text{N}_2$  physisorption at 77 K using a Micromeritics ASAP 2020 surface area analyzer. The polymer morphology was studied with Sigma HD Scanning Electron Microscopy (SEM). HRTEM images were captured with a JEM-2100. XPS measurements were carried out using an

ESCALAB 250Xi analyzer. The SA concentration was measured using a Shimadzu UV2600 UV-Vis absorption spectrometer.

### 1.3. Thermodynamic parameters

These parameters such as  $\Delta H$ ,  $\Delta S$ , and  $\Delta G$  were calculated in accordance with Eqs (S1) and (S2) were derived by quantifying the adsorption of SA on BZI-HCMPs at various temperatures. According to Freundlich model, the parameters were obtained as follows:

$$\lg(q_e / C_e) = \Delta S / (2.303R) - \Delta H / (2.303RT) \quad (S1)$$

$$\Delta G = \Delta H - T\Delta S \quad (S2)$$

Where  $q_e$  represents the equilibrium capacity (mg/g),  $C_e$  signifies the equilibrium concentration (mg/L),  $R$  represents the general gas constant (8.314 J/(mol·K)), and  $T$  denotes temperature (K).

**Fig. S1** SEM images of (A) CMPs, (B) HCMPs and (C) BZI-HCMPs.

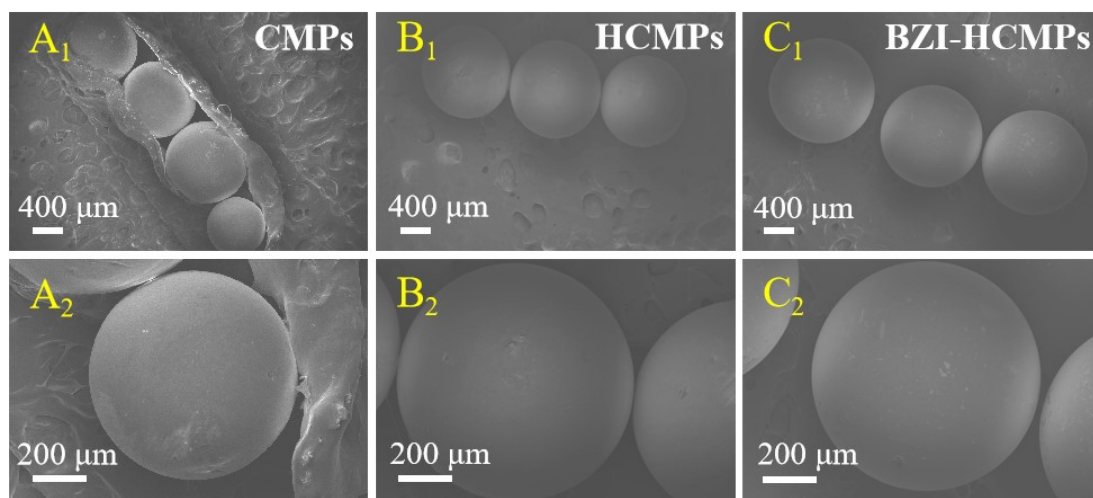

**Fig. S2** XRD patterns of CMPs, HCMPs, and BZI-HCMPs.

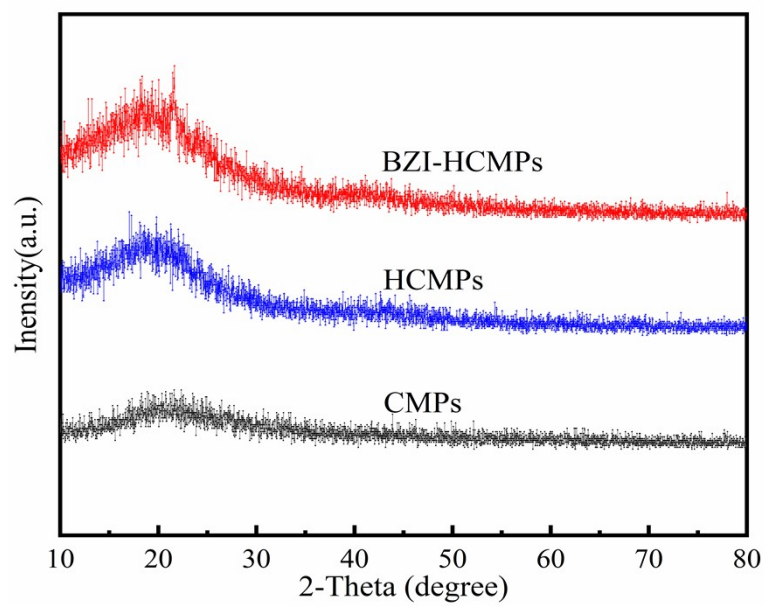

**Fig. S3** UV-vis DRS of CMPs, HCMPs, and BZI-HCMPs.

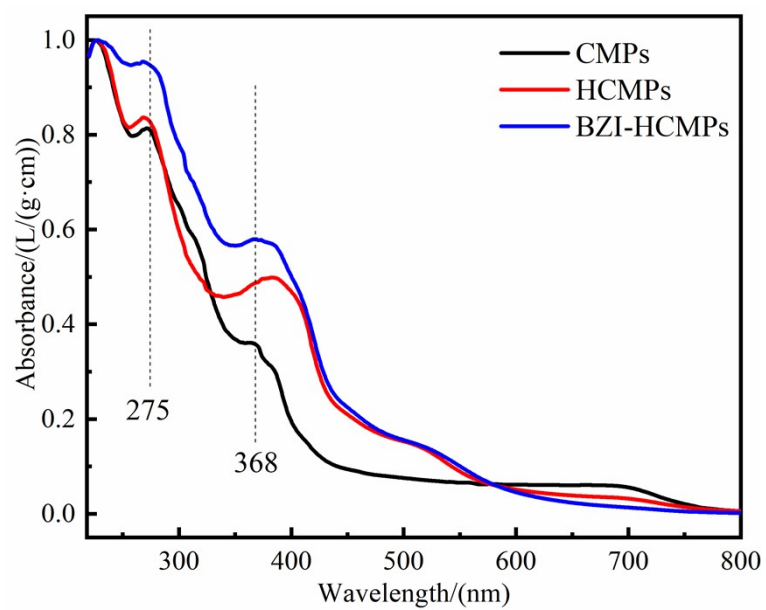

**Scheme S1** Potential interaction between BZI-HCMPs and SA.

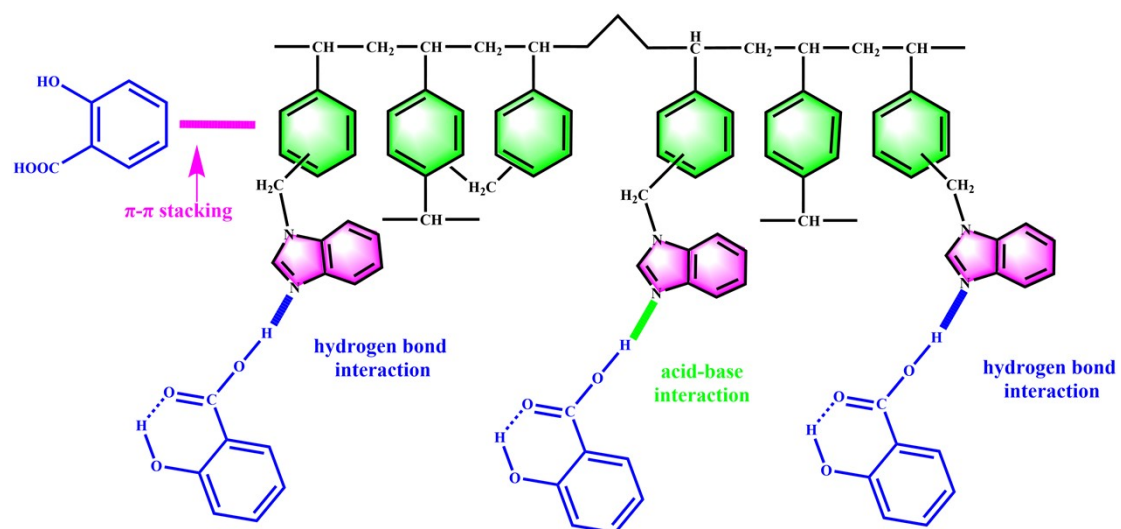

**Table S1** Correlated parameters of the equilibrium data for the adsorption of SA on BZI-HCMPs at 293, 303, and 313 K according to the Langmuir and Freundlich models.

|                     | Langmuir model      |                     |        | Freundlich model                         |      |        |
|---------------------|---------------------|---------------------|--------|------------------------------------------|------|--------|
|                     | $K_L/(\text{L/mg})$ | $q_m/(\text{mg/g})$ | $R^2$  | $K_F/((\text{mg/g})(\text{L/mg})^{1/n})$ | $n$  | $R^2$  |
| BZI-HCMPs<br>(293K) | 0.01443             | 243.1817            | 0.9797 | 11.0641                                  | 1.88 | 0.9966 |
| BZI-HCMPs<br>(303K) | 0.01423             | 275.0057            | 0.9897 | 12.2036                                  | 1.86 | 0.9887 |
| BZI-HCMPs<br>(313K) | 0.02142             | 295.1372            | 0.9437 | 13.1782                                  | 1.82 | 0.9639 |



**Fig. S4** Vant-Hoff plotting of  $\log (q_e/C_e)$  versus  $1/T$  (BZI-HCMPs).

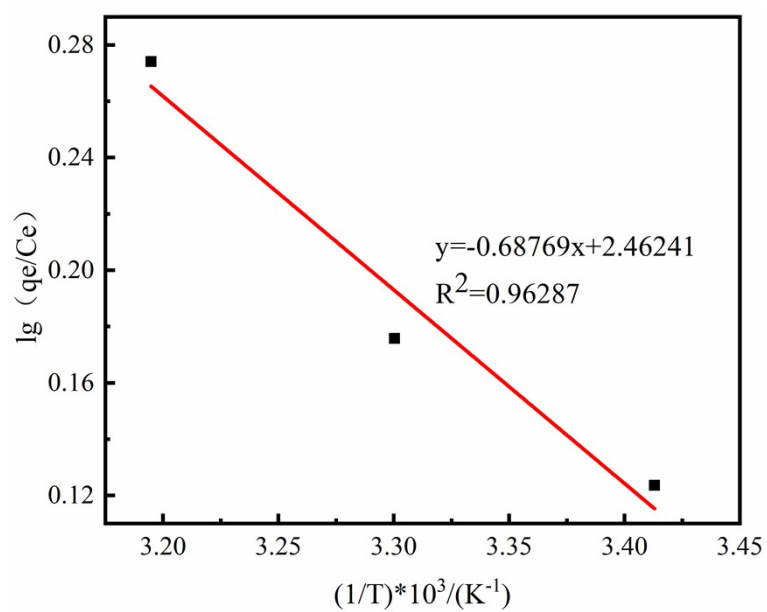

**Table S2** Adsorption thermodynamic parameters of BZI-HCMPs.

| Temp. (K) | $\Delta G$ (kJ/mol) | $\Delta H$ (kJ/mol) | $\Delta S$ (J/(mol·K)) |
|-----------|---------------------|---------------------|------------------------|
| 293       | -0.647              | 13.167              | 47.148                 |
| 303       | -1.119              | 13.167              | 47.148                 |
| 313       | -1.590              | 13.167              | 47.148                 |

**Table S3** Relevant parameters of kinetic data for the adsorption of SA on the BZI-HCMPs at 293, 303, and 313K.

|                   | Pseudo-first-order  |                         |        | Pseudo-second-order |                                             |        |
|-------------------|---------------------|-------------------------|--------|---------------------|---------------------------------------------|--------|
|                   | $q_e/(\text{mg/g})$ | $k_1/(\text{min}^{-1})$ | $R^2$  | $q_e/(\text{mg/g})$ | $k_2/(\text{g}/(\text{mg}\cdot\text{min}))$ | $R^2$  |
| BZI-HCMPs (293 K) | 180.3308            | 0.03182                 | 0.9730 | 177.8354            | 0.003797                                    | 0.9329 |
| BZI-HCMPs (303 K) | 188.1661            | 0.03175                 | 0.9826 | 186.7358            | 0.005174                                    | 0.9204 |
| BZI-HCMPs (313 K) | 198.6579            | 0.03237                 | 0.9724 | 196.3758            | 0.005322                                    | 0.9025 |

**Fig. S5** The removal efficiency of SA as a function of the concentration of the polymers.

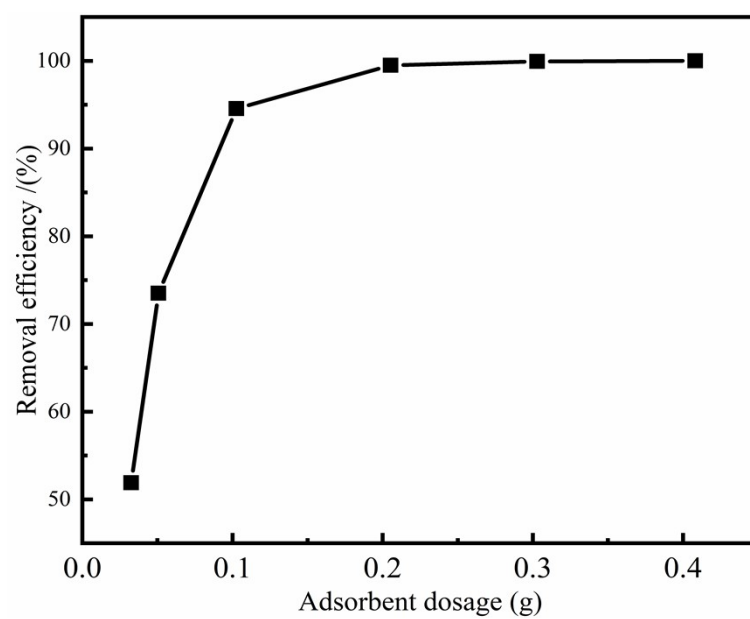

**Fig. S6** Effect of the concentration of the polymer on the adsorption.

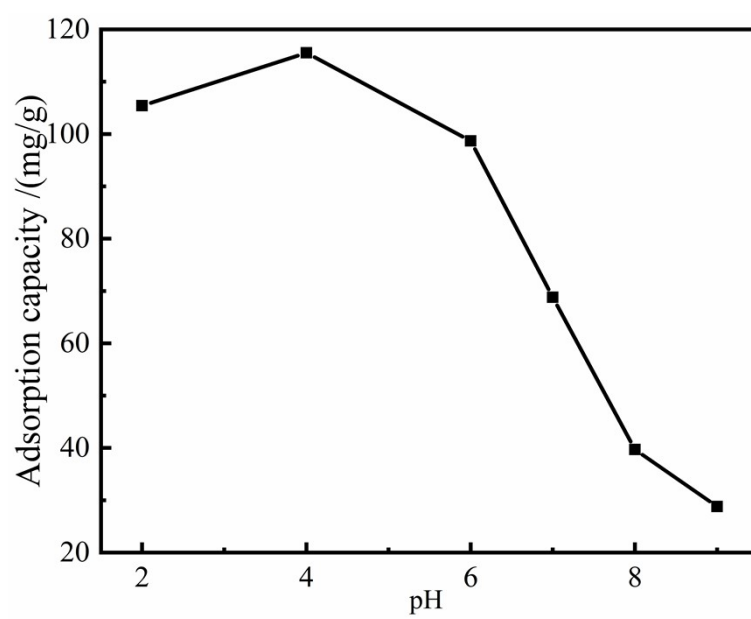

**Fig. S7** The recycling times of SA adsorption on BZI-HCMPs.

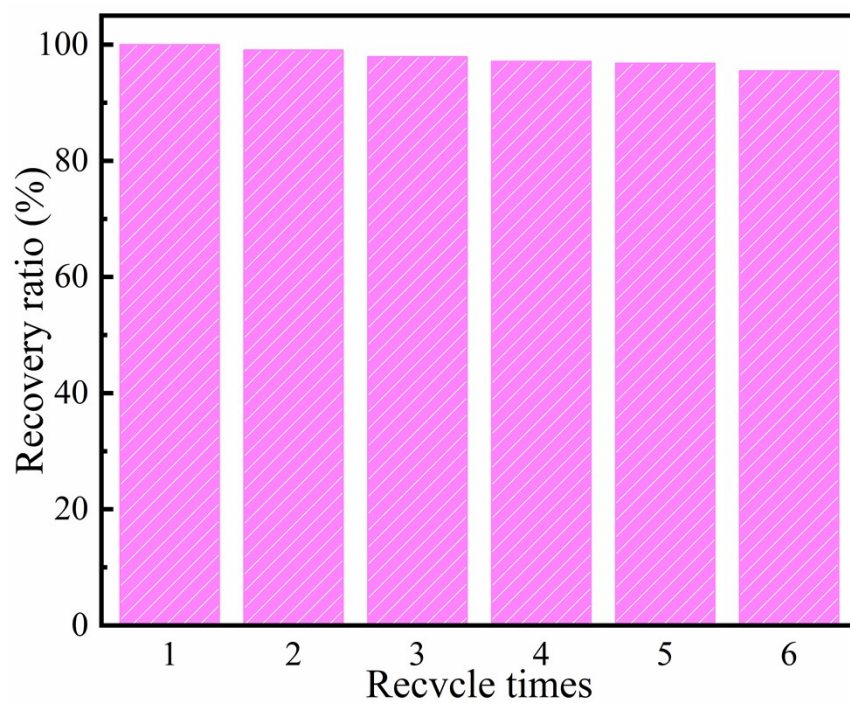

**Fig. S8** (A) Adsorption of SA in tap water; (B) Effect of  $\text{Na}_2\text{SO}_4$  concentration on SA adsorption.

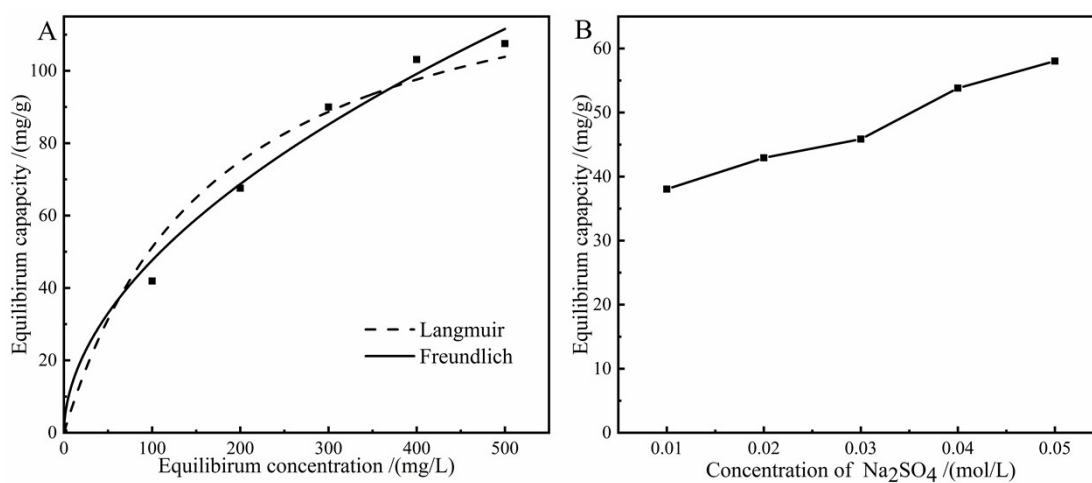

**Table S4** Fitting parameters of adsorption model after replacing deionized water with tap water on BZI-HCMPs.

|                      | Langmuir model      |                     |        | Freundlich model                         |      |        |
|----------------------|---------------------|---------------------|--------|------------------------------------------|------|--------|
|                      | $K_L/(\text{L/mg})$ | $q_e/(\text{mg/g})$ | $R^2$  | $K_F/((\text{mg/g})(\text{L/mg})^{1/n})$ | $n$  | $R^2$  |
| BZI-HCMPs<br>(298 K) | 0.0058              | 139.7405            | 0.9782 | 4.1706                                   | 1.89 | 0.9896 |

**Table S5** Environmentally-friendly and cost-effective simple analysis of synthesized BZI-HCMPs.

| Cost of raw materials            |         |                        |               | Synthesis Energy consumption analysis    |                      |                                            |
|----------------------------------|---------|------------------------|---------------|------------------------------------------|----------------------|--------------------------------------------|
| Raw                              | Dosage  | Unit price<br>(RMB/kg) | Cost<br>(RMB) | Process                                  | Time(h)&<br>Tem.(°C) | Energy<br>consumption<br>calculation (RMB) |
| CMPs                             | 20.0 g  | 250                    | 5.0           | Friedel-Crafts<br>alkylation<br>reaction | 0.25, 80             | 0.5 kW×0.25 h×1.2<br>RMB/(kW·h)=0.15       |
| DCE                              | 200 mL  | 8.0                    | 2.0           |                                          |                      |                                            |
| FeCl <sub>3</sub>                | 4.0 g   | 20.0                   | 0.1           | nucleophilic<br>substitution             | 12.0, 85             | 0.5 kW×12.0 h×1.2<br>RMB/(kW·h)=7.2        |
| NaOH                             | 8.0 g   | 6.0                    | 0.05          |                                          |                      |                                            |
| C <sub>2</sub> H <sub>5</sub> OH | 1000 mL | 10.0                   | 8.0           | Soxhlet extractor<br>washing             | 48.0, 60             | 1.0 kW×48.0 h×1.2<br>RMB/(kW·h)=57.6       |
| CH <sub>3</sub> OH               | 200 mL  | 12.0                   | 1.9           | Stoving                                  | 12.0, 60             | 1.0 kW×12.0 h×1.2<br>RMB/(kW·h)=14.4       |
| Hot H <sub>2</sub> O             | 2000 mL | 0.01                   | 0.01          | Equipment<br>/Labor                      | -                    | 0.5                                        |
| Total                            | -       | -                      | 17.06         | Total                                    | -                    | 79.85                                      |
